# Supplementary material for: Trends in Receipt of Help at Home After Hospital Discharge Among Older Adults in the US
Source: PubMed Central journal article supplement (PMC8634055; doi:10.1001/jamanetworkopen.2021.35346), 2021-11-30

## Supplemental Online Content

Bressman E, Coe NB, Chen X, Konetzka RT, Werner RM. Trends in receipt of help at home after hospital discharge among older adults in the US. *JAMA Netw Open*. 2021;4(11):e2135346. doi:10.1001/jamanetworkopen.2021.35346

**eTable 1.** Number of Respondents Included After Each Exclusion Criteria by Round

**eTable 2.** Summary of Posthospitalization Care in Study Cohort, Including All Sample Persons Discharged Home From an Acute Care Hospital (Unweighted Percentages)

**eTable 3.** Characteristics of Study Cohort and Care Received After Hospital Discharge, Including All Patients Discharged Home From an Acute Care Hospital, by Year (Weighted Percentages)

**eTable 4.** Characteristics of Study Cohort, Including All Patients Discharged Home From an Acute Care Hospital (Unweighted Percentages)

**eFigure 1.** Unweighted Percentage of Sample Persons Discharged From an Acute Care Hospitalization Who Received ADL Help After Discharge and Persons Who Received ADL and No Home Health Care After Discharge, by Year

**eFigure 2.** Weighted Percentage of Sample Persons Discharged From an Acute Care Hospitalization Who Received ADL Help After Discharge, by Year and by Survey Wave

**eFigure 3.** Unweighted Percentage of Individuals Who Reported Receiving Help in Each Month After Hospital Discharge and Those Who Received Help and Did Not Have Any Medicare-Reimbursed Home Health Visits in Those 3 Months

This supplemental material has been provided by the authors to give readers additional information about their work.

| <b>eTable 1. Number of Respondents Included After Each Exclusion Criteria by Round</b>                                          |             |             |             |             |             |             |             |
|---------------------------------------------------------------------------------------------------------------------------------|-------------|-------------|-------------|-------------|-------------|-------------|-------------|
|                                                                                                                                 | <b>2011</b> | <b>2012</b> | <b>2013</b> | <b>2014</b> | <b>2015</b> | <b>2016</b> | <b>2017</b> |
| <b>START: All NHATS respondents</b>                                                                                             | 8245        | 7075        | 5799        | 4737        | 8332        | 7274        | 6310        |
| <b>1. After excluding if age &lt;69</b>                                                                                         | 7097        | 6441        | 5527        | 4713        | 7480        | 6787        | 6083        |
| <b>2. After excluding if lived in nursing home or care facility</b>                                                             | 6070        | 5527        | 4769        | 4073        | 6534        | 5937        | 5353        |
| <b>3. After excluding if did not have any Medicare FFS claims</b>                                                               | 5096        | 4656        | 3986        | 3360        | 5016        | 4518        | 4001        |
| <b>4. After excluding if did not have an inpatient claim within 365 days prior to the survey, or prior to the date of death</b> | 809         | 932         | 816         | 624         | 842         | 801         | 779         |
| <b>5. After excluding if not hospitalized in acute care hospital or critical access hospital or was not discharged alive</b>    | 802         | 897         | 783         | 602         | 823         | 774         | 749         |
| <b>6. After excluding if went to an institutional setting after hospital discharge</b>                                          | 637         | 634         | 512         | 377         | 577         | 504         | 494         |
| <b>7. After excluding if did not have valid receipt of help (for mobility/self-care) measured (FINAL SAMPLE)</b>                | 637         | 590         | 471         | 368         | 567         | 485         | 473         |

| <b>eTable 2.</b> Summary of Posthospitalization Care in Study Cohort, Including All Sample Persons Discharged Home From an Acute Care Hospital (Unweighted Percentages) |                       |                              |                                  |
|-------------------------------------------------------------------------------------------------------------------------------------------------------------------------|-----------------------|------------------------------|----------------------------------|
|                                                                                                                                                                         | <b>Overall Cohort</b> | <b>Cohort Receiving Help</b> | <b>Cohort Not Receiving Help</b> |
| # of observations                                                                                                                                                       | <b>3591</b>           | <b>1710</b>                  | <b>1881</b>                      |
| population size                                                                                                                                                         |                       |                              |                                  |
| Received any help within 90 days after discharge, %                                                                                                                     | 1710 (47.6)           | 1710 (100.0)                 | 0 (0.0)                          |
| Received home health within 90 days after discharge, %                                                                                                                  | 1116 (31.1)           | 744 (43.5)                   | 372 (19.8)                       |
| Received help but did not have home health within 90 days after discharge, %                                                                                            | 966 (26.9)            | 966 (56.5)                   | 0 (0.0)                          |

| <b>eTable 3.</b> Characteristics of Study Cohort and Care Received After Hospital Discharge, Including All Patients Discharged Home From an Acute Care Hospital, by Year (Weighted Percentages) |                     |             |             |             |             |             |             |             |
|-------------------------------------------------------------------------------------------------------------------------------------------------------------------------------------------------|---------------------|-------------|-------------|-------------|-------------|-------------|-------------|-------------|
|                                                                                                                                                                                                 |                     | <b>2011</b> | <b>2012</b> | <b>2013</b> | <b>2014</b> | <b>2015</b> | <b>2016</b> | <b>2017</b> |
| <b># of observations</b>                                                                                                                                                                        |                     | 637         | 590         | 471         | 368         | 567         | 485         | 473         |
| <b>Estimated population size</b>                                                                                                                                                                |                     | 2,513,658   | 2,755,250   | 2,597,937   | 2,385,137   | 2,479,771   | 2,455,110   | 2,716,732   |
| <b>Post-hospitalization care</b>                                                                                                                                                                |                     |             |             |             |             |             |             |             |
| <b>Received any help within 3 months after discharge, n (%)</b>                                                                                                                                 |                     | 272 (38.1)  | 266 (39.2)  | 218 (38.3)  | 191 (47.0)  | 267 (45.8)  | 251 (49.0)  | 245 (51.5)  |
| <b>Had home health visits within 3 months after discharge, n (%)</b>                                                                                                                            |                     | 171 (24.5)  | 178 (26.4)  | 144 (27.4)  | 102 (26.0)  | 188 (28.9)  | 168 (31.7)  | 165 (33.0)  |
| <b>Received help but did not have home health visits within 3 months after discharge, n (%)</b>                                                                                                 |                     | 154 (22.1)  | 152 (22.5)  | 126 (22.6)  | 118 (29.6)  | 144 (26.2)  | 140 (28.4)  | 132 (28.1)  |
| <b>Patient characteristics</b>                                                                                                                                                                  |                     |             |             |             |             |             |             |             |
| <b>Female, n (%)</b>                                                                                                                                                                            |                     | 361 (54.3)  | 338 (53.8)  | 258 (50.9)  | 182 (46.5)  | 320 (54.3)  | 280 (55.8)  | 276 (57.2)  |
| <b>Age, mean (SD)</b>                                                                                                                                                                           |                     | 78.0 (6.3)  | 79.2 (7.0)  | 79.1 (7.2)  | 79.0 (6.9)  | 78.1 (6.7)  | 78.3 (7.1)  | 77.9 (7.3)  |
| <b>Race and ethnicity, n (%)</b>                                                                                                                                                                | White, non-Hispanic | 418 (80.0)  | 408 (81.2)  | 325 (82.2)  | 254 (82.7)  | 395 (80.3)  | 334 (79.2)  | 341 (83.6)  |
|                                                                                                                                                                                                 | Black, non-Hispanic | 158 (9.4)   | 133 (9.1)   | 107 (8.9)   | 87 (9.1)    | 117 (7.1)   | 98 (7.2)    | 97 (7.2)    |
|                                                                                                                                                                                                 | Hispanic            | 31 (5.2)    | 32 (5.7)    | 23 (4.6)    | **          | 26 (6.1)    | 19 (5.7)    | 16 (4.4)    |
| <b>Married/living with partner, n (%)</b>                                                                                                                                                       |                     | 299 (55.6)  | 249 (50.4)  | 213 (54.3)  | 174 (57.9)  | 268 (54.9)  | 224 (55.5)  | 220 (55.4)  |
| <b>Self-rated health, n (%)</b>                                                                                                                                                                 | Excellent           | *           | 36 (6.9)    | 32 (8.3)    | 20 (6.2)    | 19 (6.6)    | 28 (5.8)    | 23 (6.1)    |
|                                                                                                                                                                                                 | Very Good           | *           | 102 (18.6)  | 81 (20.7)   | 80 (25.6)   | 66 (26.7)   | 95 (23.5)   | 101 (23.7)  |
|                                                                                                                                                                                                 | Good                | *           | 179 (31.3)  | 153 (34.0)  | 118 (31.6)  | 101 (31.1)  | 177 (37.6)  | 183 (38.7)  |
|                                                                                                                                                                                                 | Fair                | *           | 175 (27.9)  | 133 (24.8)  | 107 (28.4)  | 87 (25.5)   | 127 (22.3)  | 118 (21.9)  |

|                                                   |                                                                          |           |            |            |            |            |            |            |
|---------------------------------------------------|--------------------------------------------------------------------------|-----------|------------|------------|------------|------------|------------|------------|
|                                                   | Poor                                                                     | *         | 86 (14.1)  | 56 (11.4)  | 33 (7.8)   | 33 (10.0)  | 56 (10.9)  | 48 (9.6)   |
| <b>Independent in..., n (%)</b>                   | Mobility                                                                 | *         | 403 (70.7) | 328 (75.3) | 269 (77.8) | 212 (71.8) | 331 (71.4) | 334 (71.7) |
|                                                   | Self-care                                                                | *         | 460 (82.2) | 378 (84.8) | 302 (84.2) | 242 (81.5) | 381 (81.2) | 380 (81.6) |
|                                                   | Household activities                                                     | *         | 333 (61.8) | 263 (64.4) | 222 (67.1) | 176 (61.9) | 268 (60.8) | 269 (60.8) |
|                                                   | Medical care                                                             | *         | 461 (82.2) | 353 (79.6) | 280 (80.9) | 248 (85.0) | 379 (81.7) | 380 (83.8) |
| <b>Cognitive status, n (%)</b>                    | No or Possible Impairment                                                | *         | 470 (84.6) | 306 (84.3) | 291 (84.6) | 259 (89.0) | 408 (89.3) | 391 (88.0) |
|                                                   | Probable Dementia                                                        | *         | 108 (14.0) | 96 (14.2)  | 68 (14.0)  | 47 (11.0)  | 75 (10.5)  | 82 (12.0)  |
| <b>Hospital length of stay in days, mean (SD)</b> |                                                                          | 3.7 (3.4) | 3.4 (3.0)  | 3.5 (3.0)  | 3.6 (2.5)  | 3.6 (3.3)  | 3.4 (2.7)  | 3.4 (2.5)  |
| <b>Diagnosis Related Group, n (%)**</b>           | Major joint replacement (470)                                            | 22 (4.4)  | 14 (2.9)   | 15 (4.8)   | 17 (6.0)   | 36 (8.8)   | 30 (8.5)   | 27 (10.6)  |
|                                                   | Septicemia or severe sepsis (871)                                        | 16 (2.3)  | **         | 13 (2.7)   | **         | 19 (3.2)   | 19 (4.0)   | 17 (2.4)   |
|                                                   | Esophagitis, gastroenteritis and miscellaneous digestive disorders (392) | 16 (2.3)  | 15 (2.3)   | 12 (2.4)   | **         | 15 (2.3)   | 13 (2.4)   | 13 (3.0)   |
|                                                   | Simple pneumonia & pleurisy (194)                                        | **        | 13 (1.8)   | **         | 15 (3.8)   | 13 (2.7)   | **         | **         |
|                                                   | Cellulitis (603)                                                         | 12 (2.3)  | **         | **         | **         | **         | 12 (2.8)   | **         |

\* Characteristic measured in the survey prior to hospitalization and is thus missing in the first year of the study period.

\*\* Cells with fewer than 11 respondents

| <b>eTable 4. Characteristics of Study Cohort, Including All Patients Discharged Home From an Acute Care Hospital (Unweighted Percentages)</b> |                                   |                       |                              |                                  |
|-----------------------------------------------------------------------------------------------------------------------------------------------|-----------------------------------|-----------------------|------------------------------|----------------------------------|
|                                                                                                                                               | <b>Level</b>                      | <b>Overall Cohort</b> | <b>Cohort Receiving Help</b> | <b>Cohort Not Receiving Help</b> |
| <b># of observations</b>                                                                                                                      |                                   | <b>3591</b>           | <b>1710</b>                  | <b>1881</b>                      |
| <b>Female, n (%)</b>                                                                                                                          |                                   | 2015 (56.1)           | 1092 (63.9)                  | 923 (49.1)                       |
| <b>Age, mean (SD)</b>                                                                                                                         |                                   | 81.2 (7.5)            | 82.7 (7.8)                   | 79.7 (6.8)                       |
| <b>Race and ethnicity, n (%)</b>                                                                                                              | White, non-Hispanic               | 2475 (68.9)           | 1114 (65.1)                  | 1361 (72.4)                      |
|                                                                                                                                               | Black, non-Hispanic               | 797 (22.2)            | 409 (23.9)                   | 388 (20.6)                       |
|                                                                                                                                               | Hispanic                          | 165 (4.6)             | 97 (5.7)                     | 68 (3.6)                         |
|                                                                                                                                               | Other                             | 154 (4.3)             | 90 (5.3)                     | 64 (3.4)                         |
| <b>Married/living with partner, n (%)</b>                                                                                                     |                                   | 1647 (46.3)           | 722 (42.7)                   | 925 (49.5)                       |
| <b>Self-rated health, n (%)</b>                                                                                                               | Excellent                         | 158 (5.9)             | 55 (4.2)                     | 103 (7.5)                        |
|                                                                                                                                               | Very Good                         | 525 (19.6)            | 188 (14.4)                   | 337 (24.7)                       |
|                                                                                                                                               | Good                              | 911 (34.0)            | 411 (31.4)                   | 500 (36.6)                       |
|                                                                                                                                               | Fair                              | 747 (27.9)            | 425 (32.4)                   | 322 (23.6)                       |
|                                                                                                                                               | Poor                              | 312 (11.7)            | 216 (16.5)                   | 96 (7.0)                         |
| <b>Independent in..., n (%)</b>                                                                                                               | Mobility                          | 1877 (69.7)           | 738 (56.0)                   | 1139 (82.8)                      |
|                                                                                                                                               | Self-care                         | 2143 (79.6)           | 888 (67.4)                   | 1255 (91.2)                      |
|                                                                                                                                               | Household activities              | 1531 (56.9)           | 485 (36.8)                   | 1046 (76.0)                      |
|                                                                                                                                               | Medical care                      | 2101 (78.0)           | 850 (64.5)                   | 1251 (90.9)                      |
| <b>Cognitive status, n (%)</b>                                                                                                                | No or Possible Impairment         | 2179 (80.9)           | 923 (70.0)                   | 1256 (91.3)                      |
|                                                                                                                                               | Probable Dementia                 | 476 (17.7)            | 371 (28.2)                   | 105 (7.6)                        |
| <b>Hospital length of stay in days, mean (SD)</b>                                                                                             |                                   | 3.7 (3.2)             | 4.0 (3.5)                    | 3.3 (2.9)                        |
| <b>Diagnosis Related Group, n (%)</b>                                                                                                         | Major joint replacement (470)     | 162 (4.5)             | 88 (5.1)                     | 74 (3.9)                         |
|                                                                                                                                               | Septicemia or severe sepsis (871) | 102 (2.8)             | 68 (4.0)                     | 34 (1.8)                         |

|  |                                                                          |          |          |          |
|--|--------------------------------------------------------------------------|----------|----------|----------|
|  | Esophagitis, gastroenteritis and miscellaneous digestive disorders (392) | 93 (2.6) | 54 (3.2) | 39 (2.1) |
|  | Simple pneumonia & pleurisy (194)                                        | 75 (2.1) | 29 (1.7) | 46 (2.4) |
|  | Cellulitis (603)                                                         | 69 (1.9) | 22 (1.3) | 47 (2.5) |

**eFigure 1.** Percentage of Sample Persons Discharged From an Acute Care Hospitalization Who Received ADL Help After Discharge and Persons Who Received ADL and No Home Health Care After Discharge, by Year (Unweighted)

**A: Persons Receiving ADL Help After Discharge**

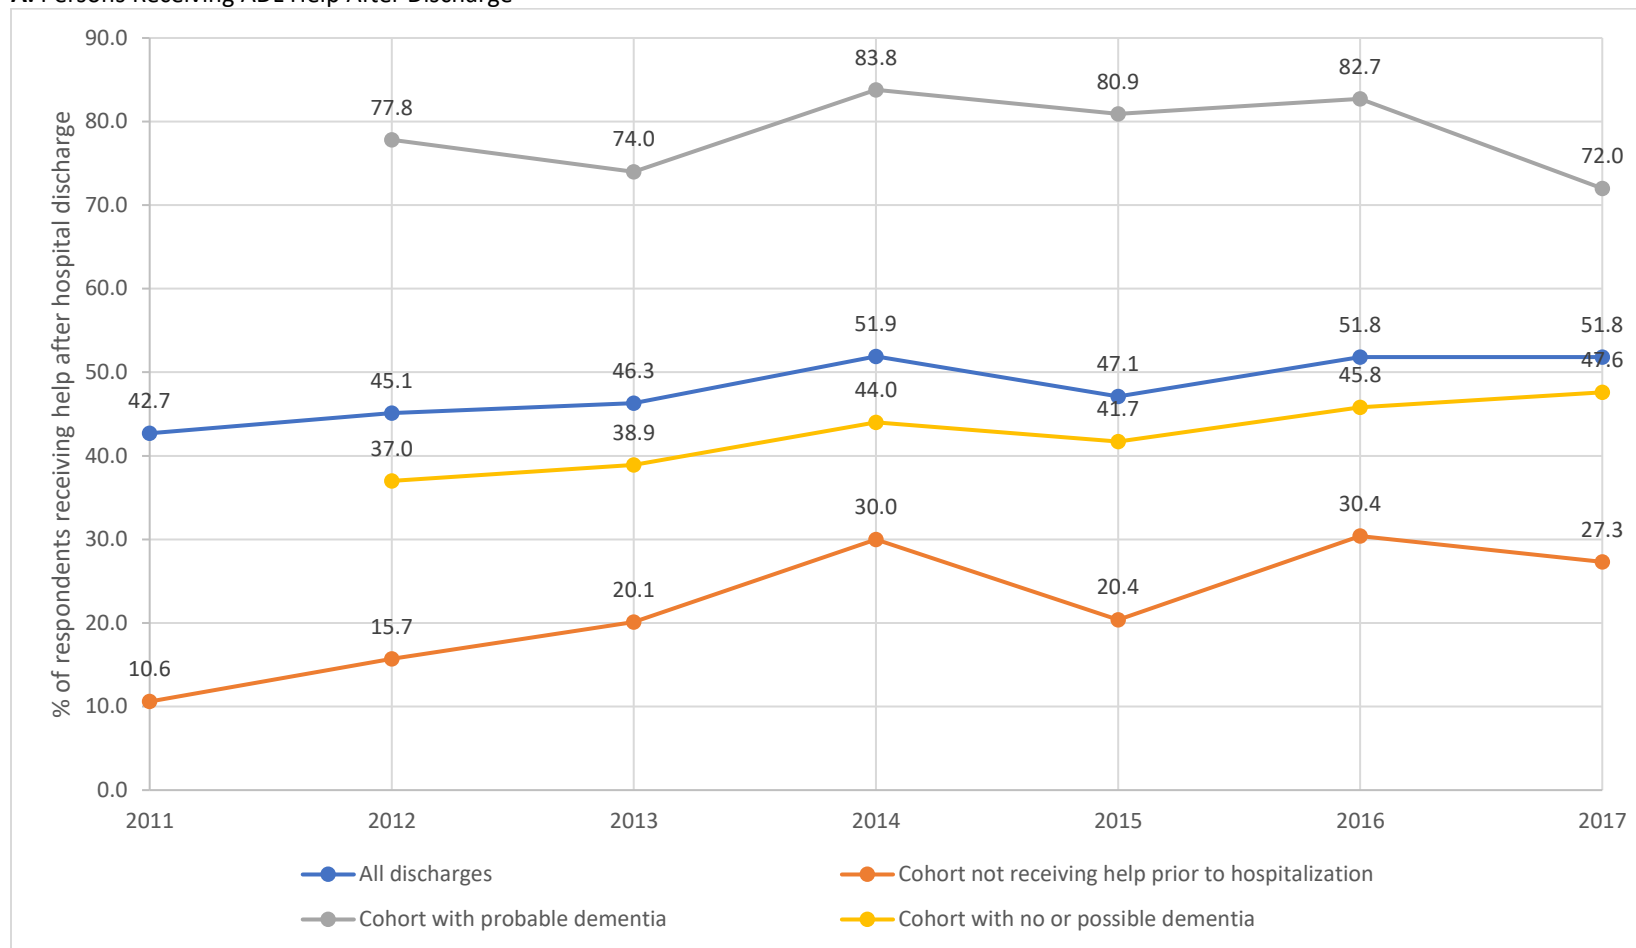



**Appendix Figure 1b:** Persons Receiving ADL Help and No Home Health After Discharge

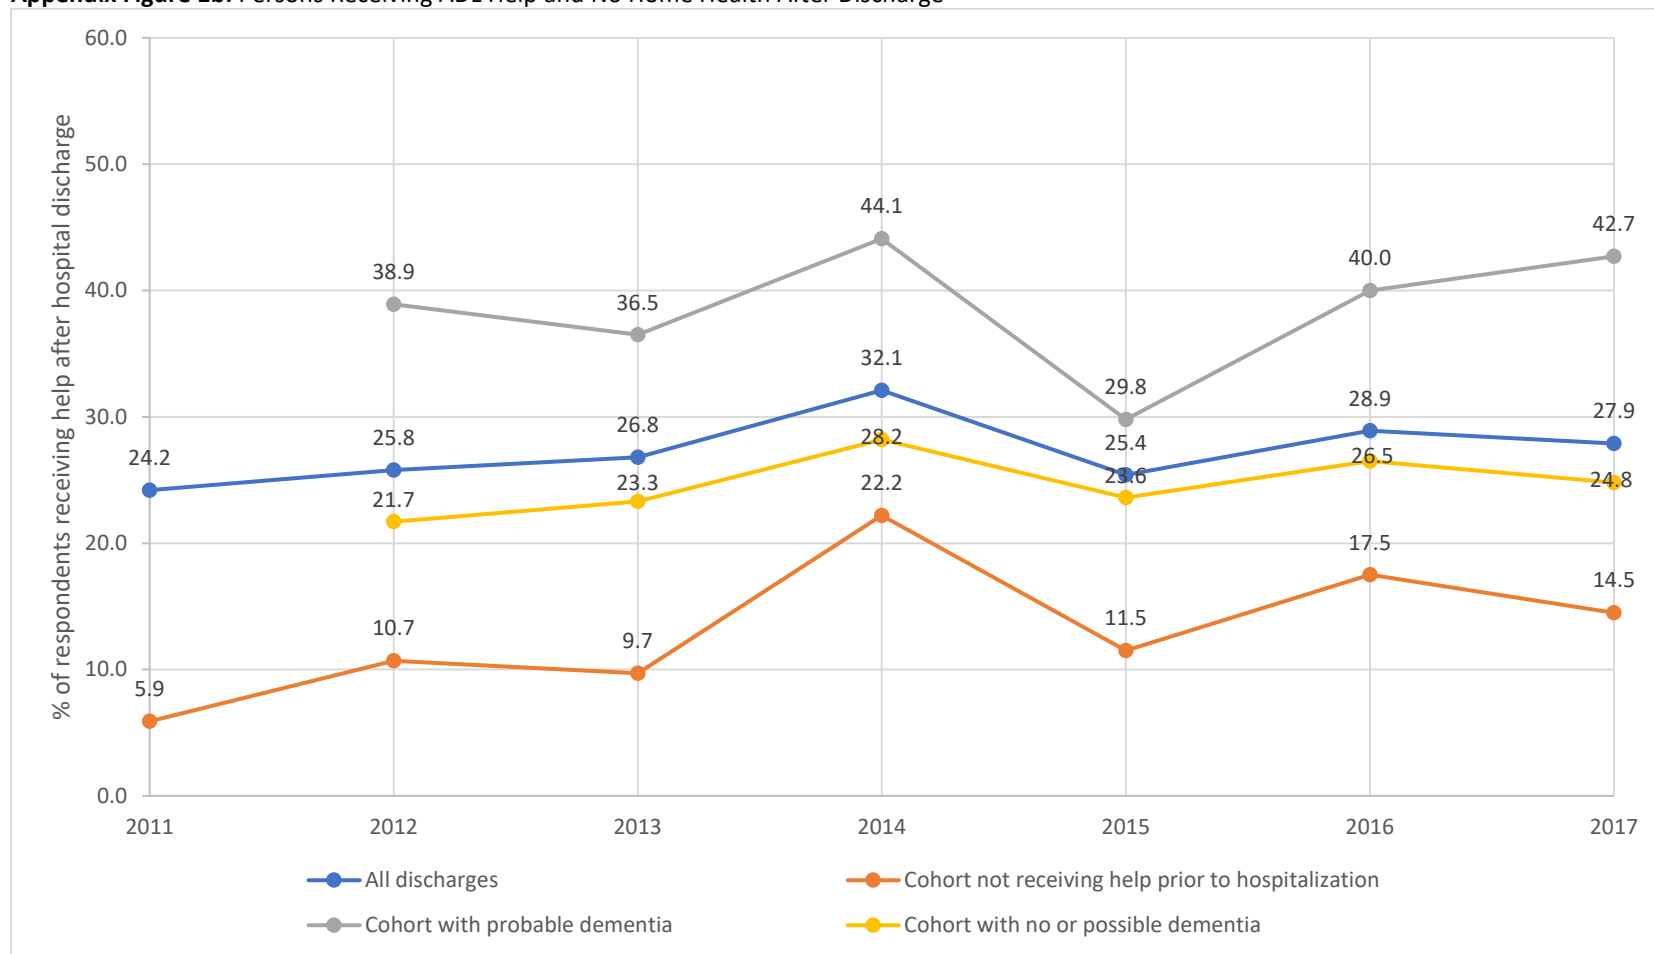

**eFigure 2.** Weighted Percentage of Sample Persons Discharged From an Acute Care Hospitalization Who Received ADL Help After Discharge, by Year and by Survey Wave

A. Persons Discharged From an Acute Care Hospitalization Who Received ADL Help After Discharge

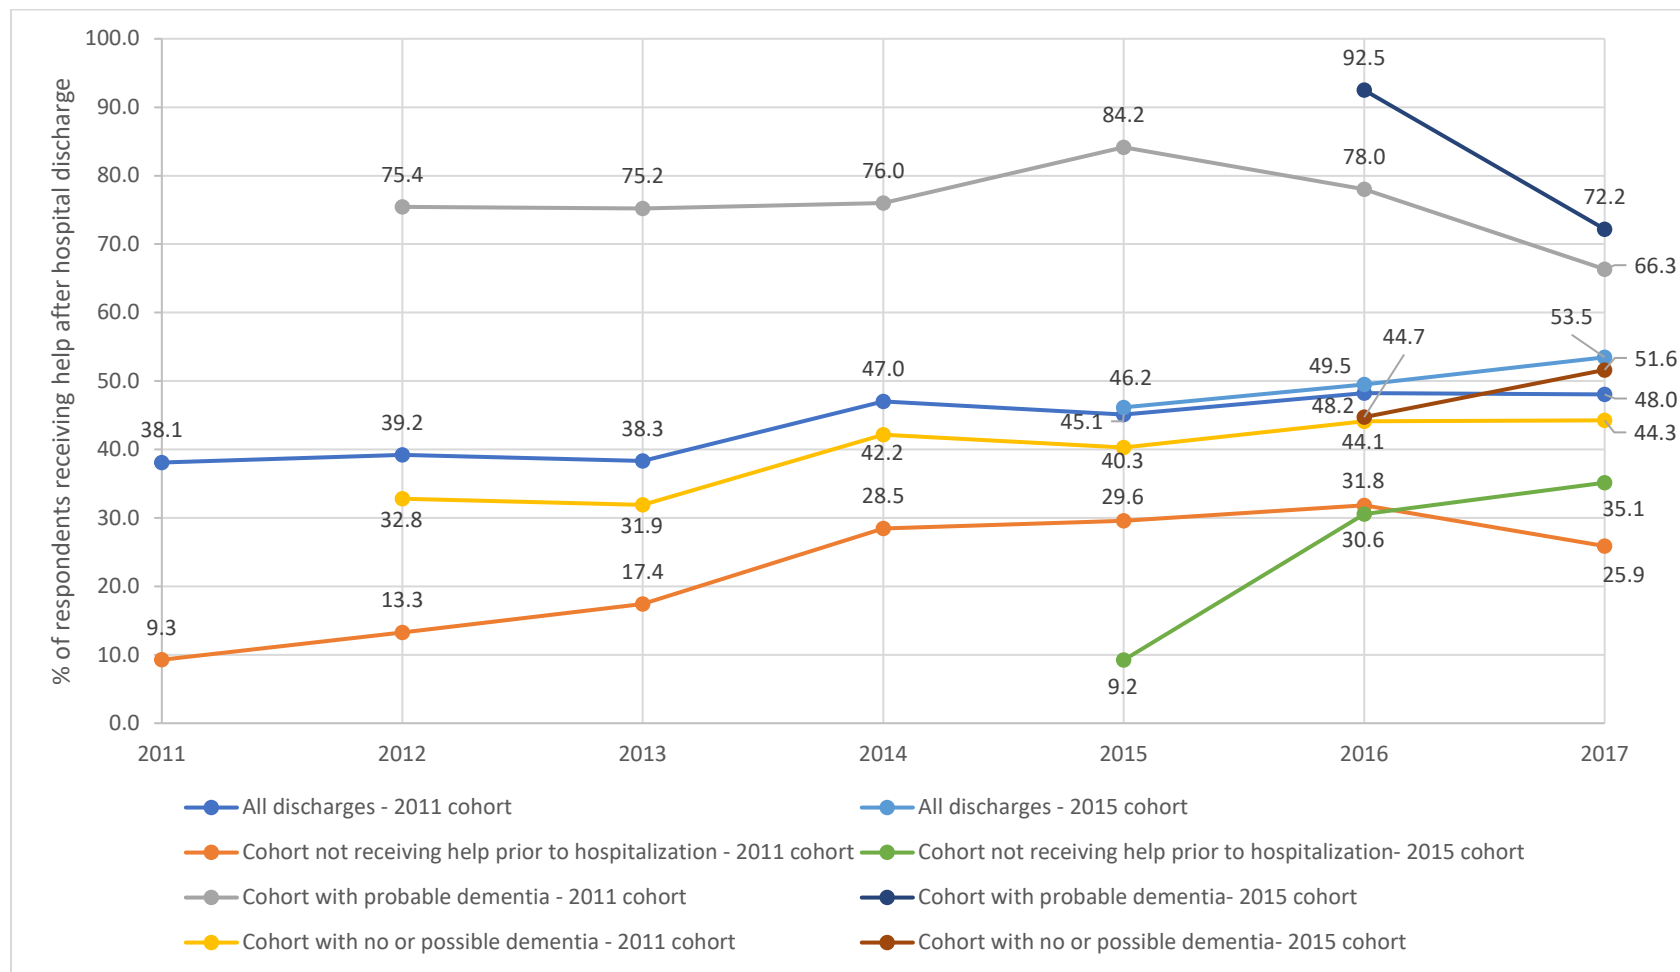

**B: Persons Discharged From an Acute Care Hospitalization Who Received ADL Help and No Home Health After Discharge**

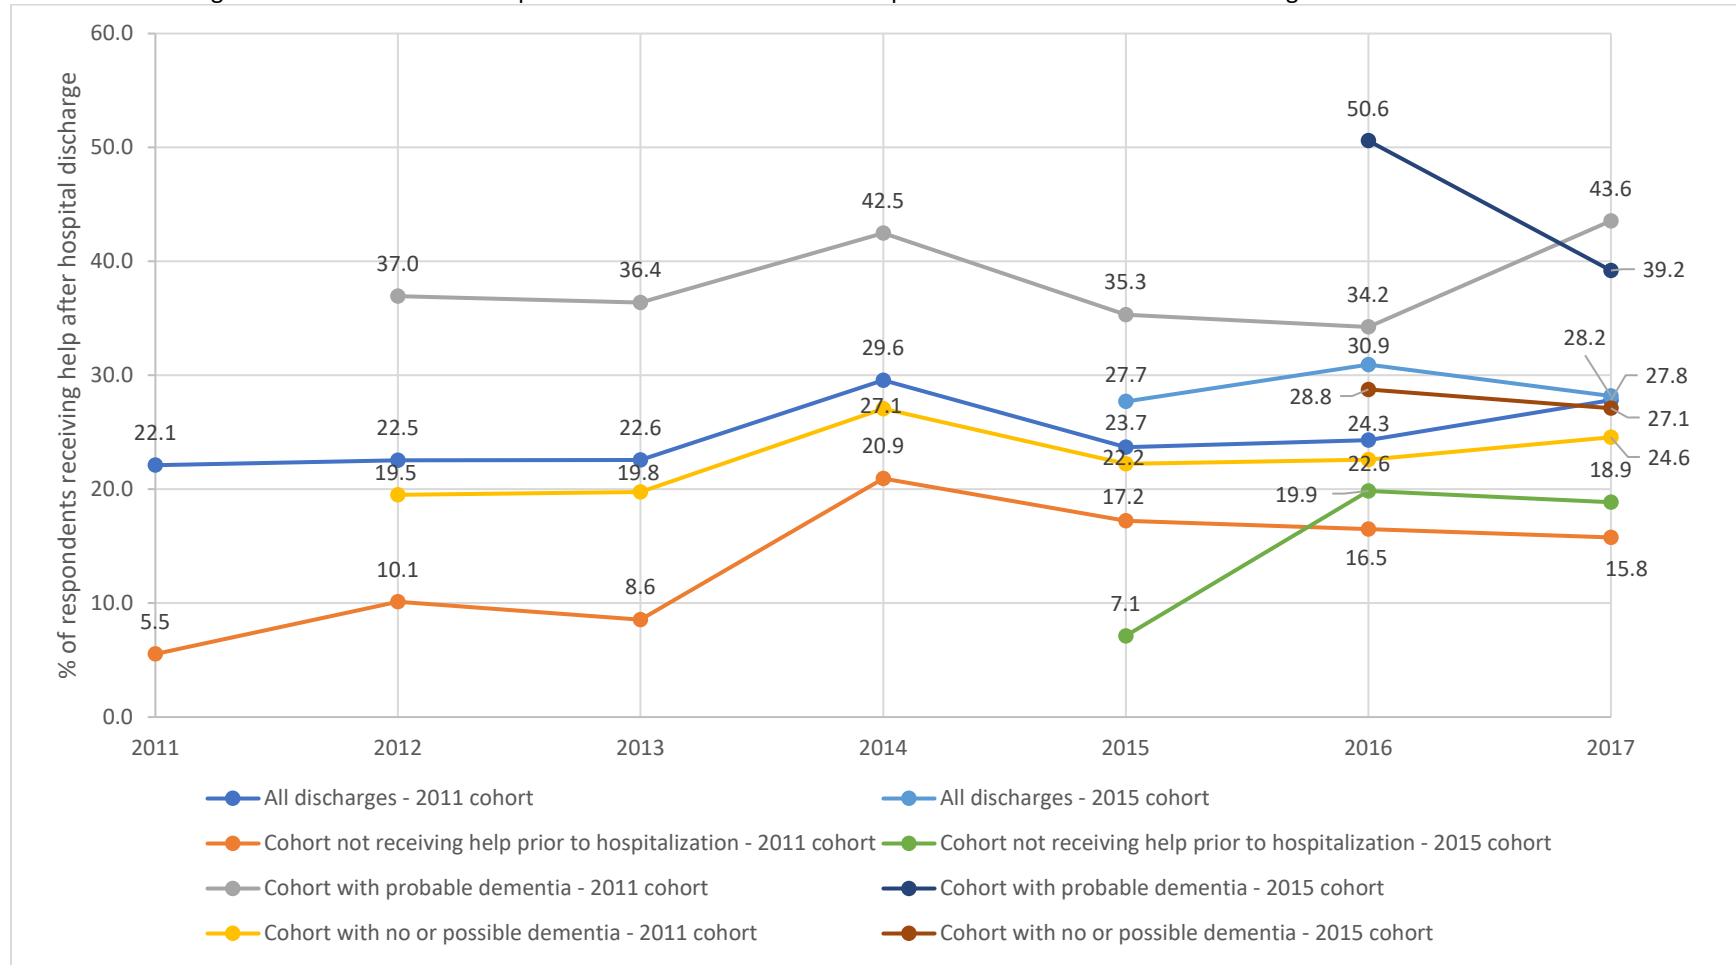

**eFigure 3.** Unweighted Percentage of Individuals Who Reported Receiving Help in Each Month After Hospital Discharge and Those Who Received Help and Did Not Have Any Medicare-Reimbursed Home Health Visits in Those 3 Months

**A.** Individuals Who Reported Receiving Help in Each Month After Hospital Discharge

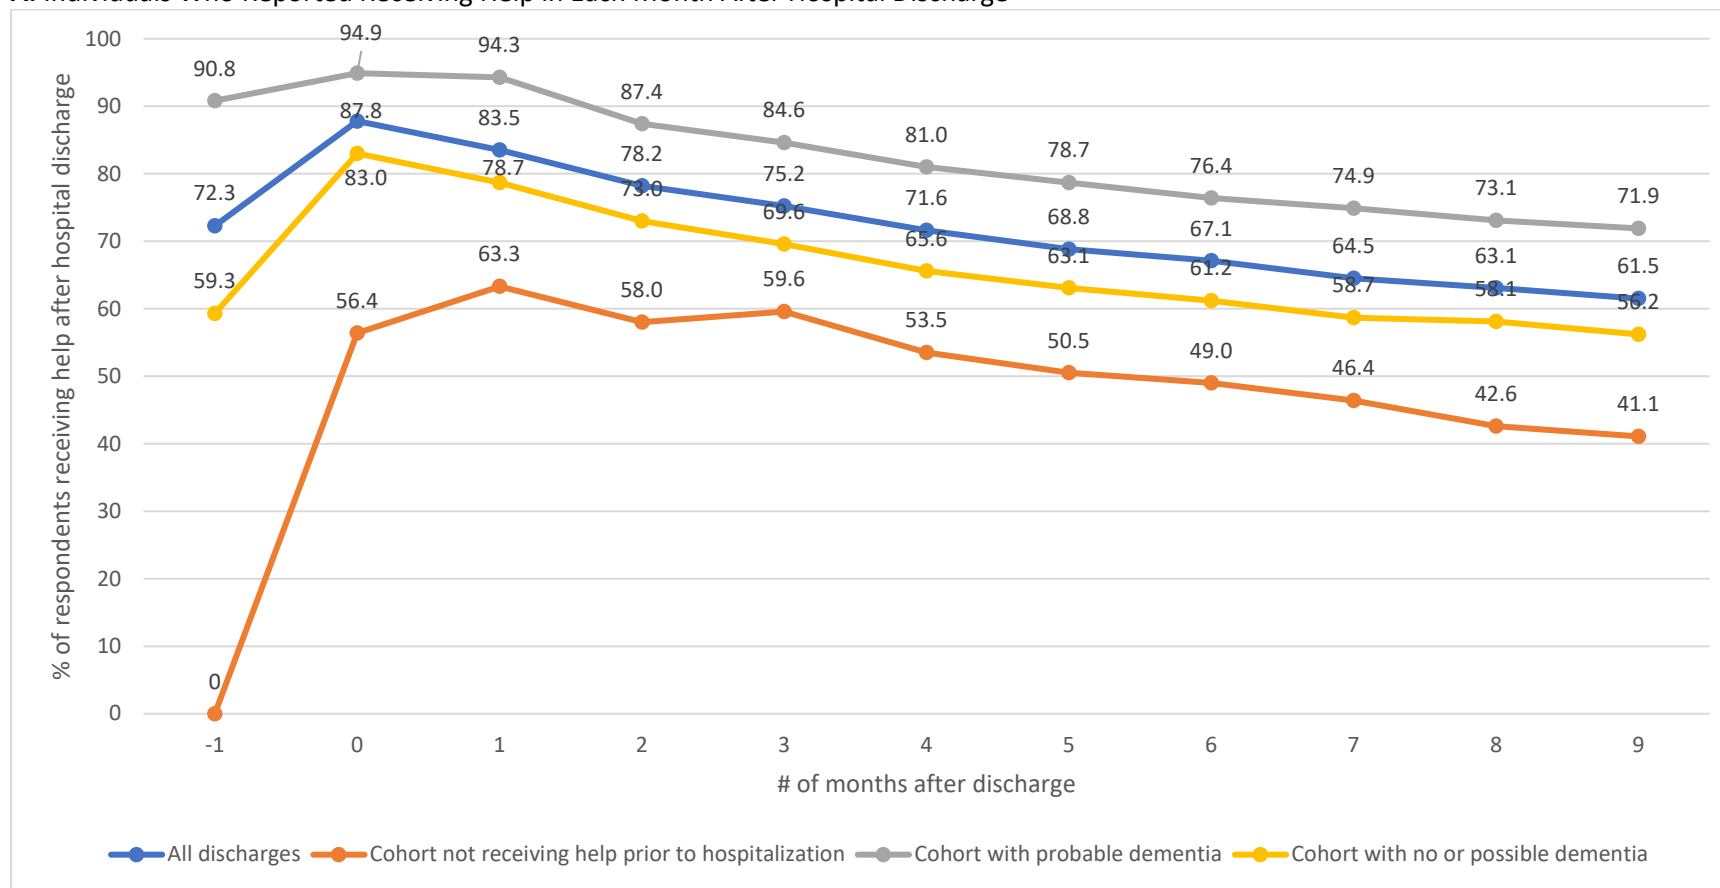

**B: Individuals Who Received Help and Did Not Have Any Medicare-Reimbursed Home Health Visits in Those 3 Months**

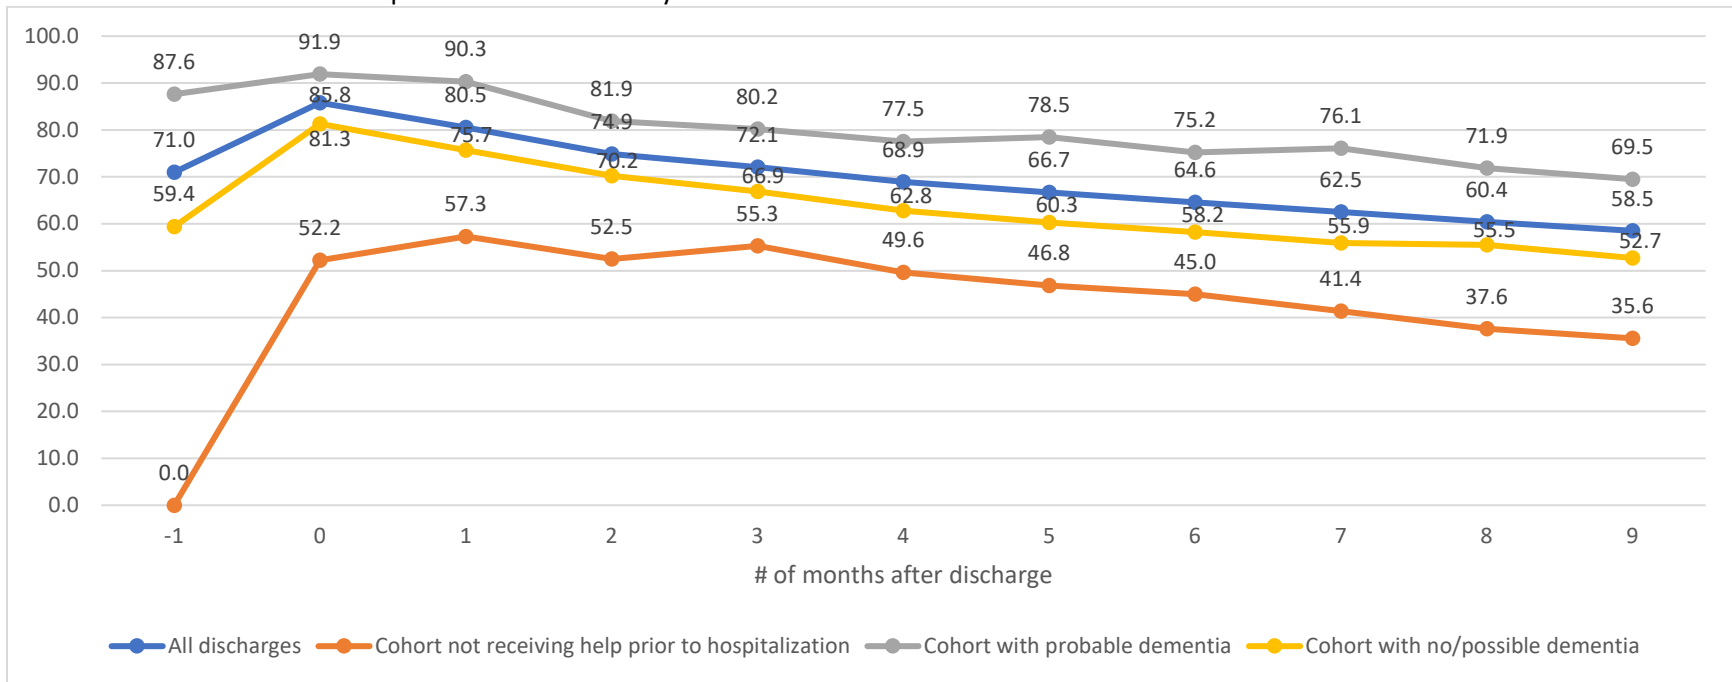

Supplement: jamanetwopen-e2135346-s001.pdf [file jamanetwopen-e2135346-s001.pdf]
